# Supplementary material for: Lysine inhibits apoptosis in satellite cells to govern skeletal muscle growthviathe JAK2-STAT3 pathway
Source: Royal Society of Chemistry journal article supplement (doi:10.1039/d0fo00047g), 2020-01-01
Supplement: d0fo00047g1.pdf [file d0fo00047g1.pdf]

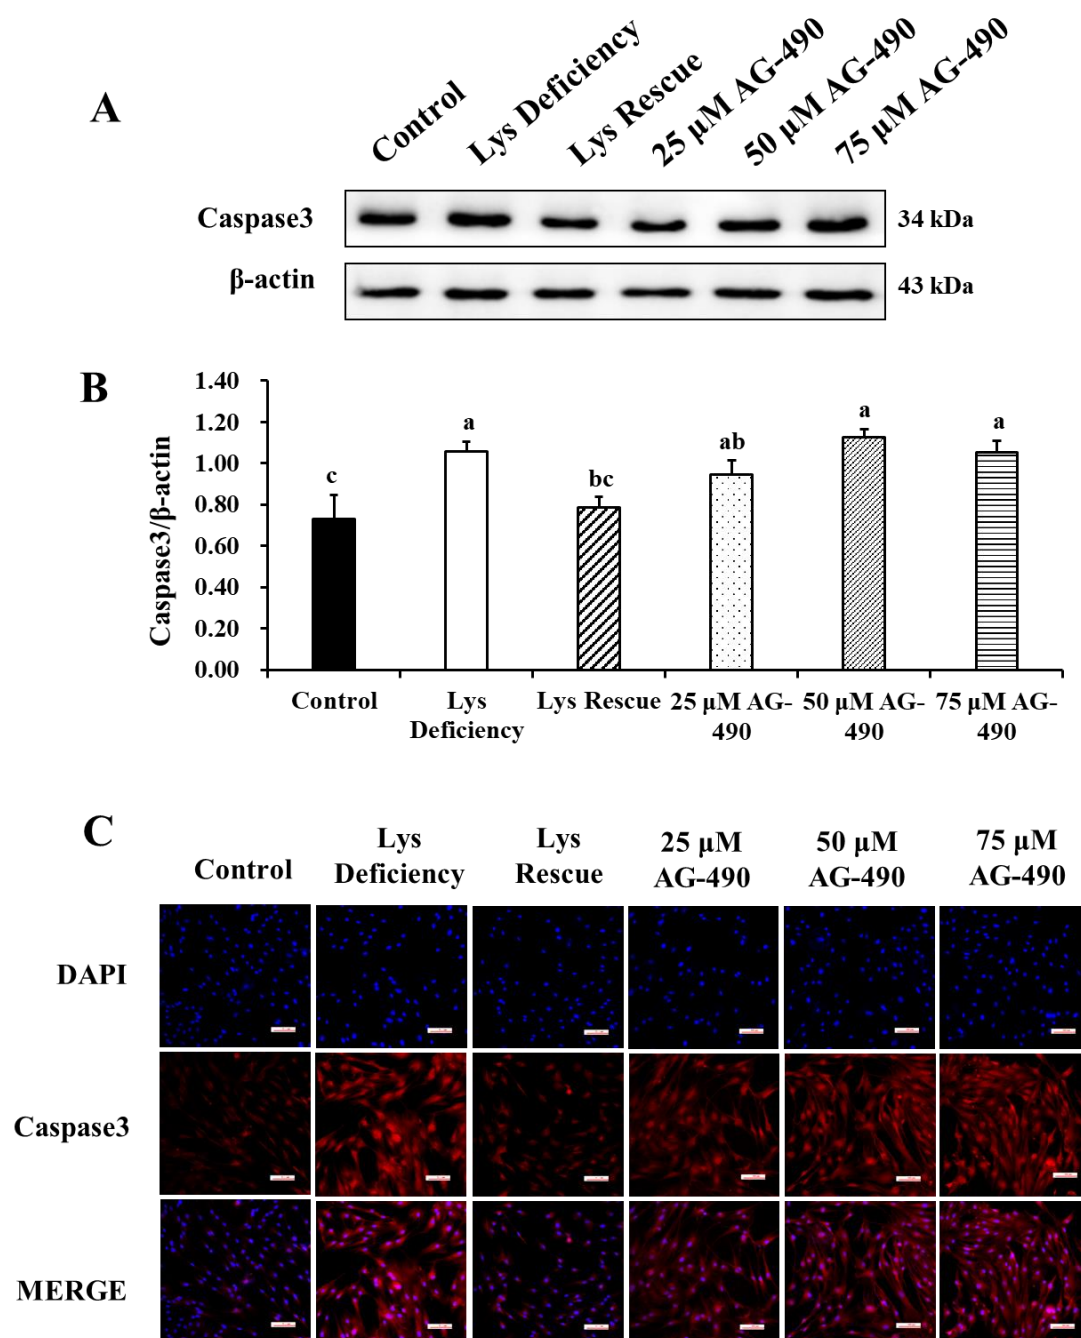

**Figure S1. A specific inhibitor of JAK2 upregulated caspase3 expression.** (A) Western blotting analysis of caspase3 in SCs after treatment for 96 h. (B) Quantification of western blotting for caspase3. The values are represented as the ratio of caspase3 levels to  $\beta$ -actin ( $n=3$ ). (C) Immunofluorescence staining was used to confirm the change in caspase3 after SCs were treated for 96 h. Bar 100  $\times$ . The results are shown

as the mean  $\pm$  SEM,  $*P < 0.05$ . Lys deficiency: Lys deficiency for 96 h. Lys rescue:  
Lys deficiency for 48 h and supplementation with Lys for another 48 h. 25  $\mu$ M AG-490:  
Lys deficiency for 48 h and supplementation with Lys and 25  $\mu$ M AG-490 for 48 h. 50  
 $\mu$ M AG-490: Lys deficiency for 48 h and supplementation with Lys and 50  $\mu$ M AG-  
490 for 48 h. 75  $\mu$ M AG-490: Lys deficiency for 48 h and supplementation with Lys  
and 75  $\mu$ M AG-490 for 48 h.
